# Supplementary material
Source: publisher figshare collection journal article supplement (https://becaris.figshare.com/articles/dataset/_/25541467)
Supplement: Supplementary file 1 [file 1]

## Sheet: Sheet3
Appendix Table 1: Eligibility criteria definitions from TTA/TCA and ConcertAI Patient360™ for the ECA.
TTA/TCA Trial Eligibility Criterion	ConcertAI Patient360™ Criterion
Patients had histologically/cytologically proven Stage IV primary NSCLC that was newly diagnosed or recurrent after previous surgery and/or irradiation between August 2009 – May 2014	Diagnosed NSCLC stage IV or metastatic disease between January 2001 – April 2022, any time prior to initiation of 1L treatment.
Patients were excluded if they received prior chemotherapy for NSCLC, platinum-based chemotherapy for any purpose, any drug targeting the EGFR or VEGF pathways, any chimerized or mouse monoclonal antibody therapies, or had documented presence of human anti-mouse antibodies.	Received 1L treatment with paclitaxel + carboplatin based on a regimen-based line of therapy definition
Patients must have a computed tomography or magnetic resonance imaging scan of the brain to evaluate for central nervous system disease within 42 days prior to registration; patient must not have brain metastases unless: (1) metastases have been treated and have remained controlled for at least two weeks following treatment, AND (2) patient has no residual neurological dysfunction off corticoster…	Not able to be defined
Patients may have measurable or non-measurable disease documented by CT or MRI; the CT from a combined PET/CT may be used to document only non-measurable disease unless it is of diagnostic quality; measurable disease must be assessed within 28 days prior to registration; pleural effusions, ascites and laboratory parameters are not acceptable as the only evidence of disease; non-measurable disease…	Not able to be defined
18 years of age or older at consent	18 years of age or older at stage IV or metastatic NSCLC diagnosis
Sex information provided – male or female	Sex information provided in patient record– male or female
Patients must not be pregnant or nursing	Not able to be defined
Patients provided prior smoking history	Prescence of smoking history in patient record
ECOG 0 or 1 14-days prior to registration	ECOG 0 or 1 90-days prior or 90-days post 1L initiation
Patients must have tumor tissue available for submission that is sufficient for EGFR FISH testing if participating in translational research– EGFR positive or non-positive	If diagnosed with stage IV or metastatic NSCLC after January 2015, EGFR status must be non-positive
Absolute neutrophil count ≥ 1,500/mcl 14-days prior to registration	Absolute neutrophil count ≥ 1,500/mcl or missing ≤ 90-days prior to 1L treatment
Platelet count ≥ 100,000/mcl 14-days prior to registration	Platelet count ≥ 100,000/mcl or missing ≤ 90-days prior to 1L treatment
Hemoglobin ≥ 9 g/dl 14-days prior to registration	Hemoglobin ≥ 9 g/dl or missing ≤ 90-days prior to 1L treatment
Serum creatinine ≤ the IULN 14-days prior to registration	Serum creatinine ≤ IULN* or missing ≤ 90-days prior to 1L treatment
A calculated or measured creatinine clearance ≥ 50 cc/min using the following cockroft-gault formula 14-days prior to registration	A calculated or measured creatinine clearance ≥ 50 cc/min using the following cockroft-gault formula or missing ≤ 90-days prior to 1L treatment
Adequate hepatic function (serum bilirubin ≤ 2x IULN and either SGOT or SGPT ≤ 2x IULN; for patients with liver metastases, bilirubin and either SGOT or SGPT must be ≤ 5x IULN 14-days prior to registration	Adequate hepatic function (serum bilirubin ≤ 2x IULN and either SGOT or SGPT ≤ 2x IULN or missing; for patients with liver metastases, bilirubin and either SGOT or SGPT must be ≤ 5x IULN ≤ 90-days prior to 1L treatment
< Grade 2 symptomatic neuropathy-sensory 14-days prior to registration	Patients must have a missing value or NOT be ≥ grade 2 symptomatic neuropathy-sensory ≤ 90-days prior to 1L treatment
No evidence of active infection or acute hepatitis 14-days prior to registration	Patients must not have adverse events including hepatitis viral that fall in the infections and infestations category ≤ 90-days prior to 1L treatment
No history (within the prior 6 months) of cerebrovascular accident, myocardial infarction or unstable angina and no evidence of uncontrolled hypertension, NYHA grade 2 or higher congestive heart failure, serious cardiac arrhythmia requiring medication or clinically significant vascular disease	Patients must NOT have the following adverse event within 6 months prior to 1L initiation: ischemia cerebrovascular, myocardial infarction, hypertension, heart failure, ventricular arrhythmia
Patient must not have brain metastases unless: (1) metastases have been treated and have remained controlled for at least two weeks following treatment, AND (2) patient has no residual neurological dysfunction off corticosteroids for at least 1 day	Patients must not have documented brain metastases ≤ 90-days prior to 1L treatment
No other prior malignancy is allowed except for the following: adequately treated basal cell or squamous cell skin cancer, in situ cervical cancer, adequately treated Stage I or II cancer from which the patient is currently in complete remission, or any other cancer from which the patient has been disease-free for 5 years	No malignancy documented prior to 1L initiation.
Abbreviations: Alanine transaminase, SGPT; Aspartate transaminase, SGOT; Computerized tomography, CT; Eastern Cooperative Oncology Group, ECOG; Epidermal growth factor receptor, EGFR; External control arm, ECA; First-line of therapy, 1L; Fluorescence in situ hybridization, FISH; Institutional Upper Limit of Normal, IULN; Magnetic resonance imaging, MRI; New York Heart Association, NYHA; Non-small…
